# Supplementary material
Source: publisher site journal article supplement (https://www.dovepress.com/article/210014)
Supplement: Supplementary file 1 [file get_supplementary_file.php]

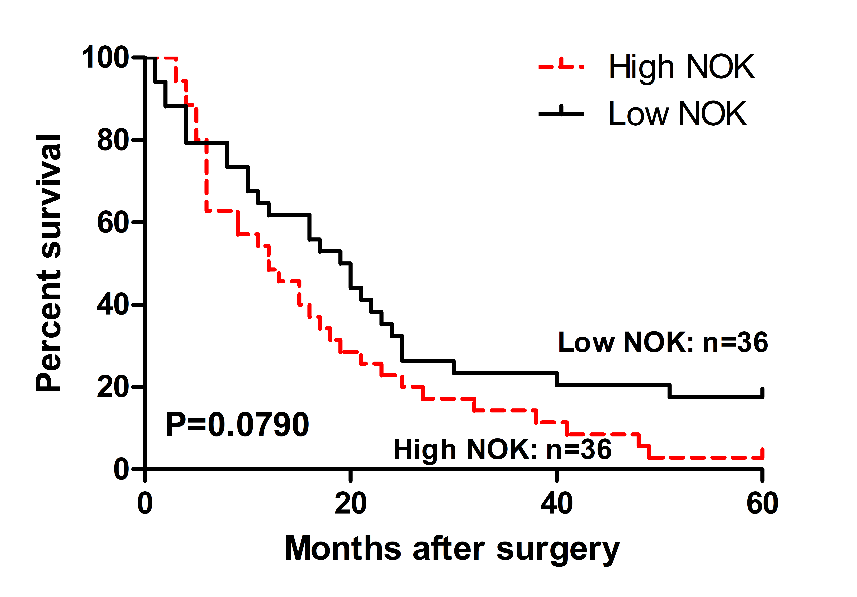


**Supplementary Figure 1:** NOK expression and OS of NSCLC patients. Kaplan-Meier survival analysis according to NOK expression. *P*=0.0790*.*
